# Supplementary material for: Use of potential determining ions to control energetics and photochemical charge transfer of a nanoscale water splitting photocatalyst
Source: Royal Society of Chemistry journal article supplement (doi:10.1039/c3ee42993h), 2013-11-27
Supplement: c3ee42993h.pdf [file c3ee42993h.pdf]

# **Use of Potential Determining Ions to Control Energetics and Photochemical Charge Transfer of a Nanoscale Water Splitting Photocatalyst**

Rachel L. Chamousis<sup>[a]</sup>, Frank E. Osterloh<sup>\*[a]</sup>

## **Supporting Information (8 pages)**

Electron microprobe analyses, charge density calculations, photocurrent scans, and hydrogen evolution data.

1. Electron microprobe analysis (Table S1, S2) yielded mass percent of 0.73 ( $\text{Sr}^{2+}$ ) and 1.45 ( $\text{K}^+$ ) in the products, which corresponds to 0.11 Sr ions and 0.21 K ions per  $[\text{Ca}_2\text{Nb}_3\text{O}_{10}]^-$  formula unit. This confirms partial exchange of  $\text{H}^+$  and TBA<sup>+</sup> cations with  $\text{K}^+$  and  $\text{Sr}^{2+}$  respectively.

**Table S1** Electron microprobe data for  $\text{Sr}_{1/2}[\text{Ca}_2\text{Nb}_3\text{O}_{10}] \times \text{Sr}(\text{NO}_3)_2$

| Data Set           | Weight Percent |      |       |       |       | Adjusted Atomic Percent* |      |       |       |       |
|--------------------|----------------|------|-------|-------|-------|--------------------------|------|-------|-------|-------|
|                    | Ca             | Sr   | Nb    | O     | Total | Ca                       | Sr   | Nb    | O     | Total |
| 1                  | 13.86          | 1.21 | 46.30 | 25.47 | 86.84 | 14.11                    | 0.56 | 20.35 | 64.98 | 100   |
| 2                  | 13.14          | 2.06 | 43.73 | 24.07 | 83.00 | 14.09                    | 1.01 | 20.23 | 64.67 | 100   |
| 3                  | 13.42          | 1.51 | 45.82 | 25.09 | 85.83 | 13.88                    | 0.71 | 20.44 | 64.97 | 100   |
| 4                  | 13.18          | 1.61 | 43.07 | 23.80 | 81.66 | 14.31                    | 0.80 | 20.17 | 64.73 | 100   |
| 5                  | 13.85          | 1.27 | 46.77 | 25.67 | 87.56 | 14.01                    | 0.59 | 20.40 | 65.01 | 100   |
| Average            |                |      |       |       |       | 14.08                    | 0.73 | 20.32 | 64.87 |       |
| Atomic Composition |                |      |       |       |       | 2.01                     | 0.11 | 2.90  | 9.27  |       |

\*Carbon and hydrogen cannot be accurately quantified due to analytical limitations

**Table S2** Electron microprobe data for  $\text{K}[\text{Ca}_2\text{Nb}_3\text{O}_{10}] \times \text{KNO}_3$

| <b>Data Set</b>           | <b>Weight Percent</b> |          |           |          |              | <b>Adjusted Atomic Percent*</b> |          |           |          |              |
|---------------------------|-----------------------|----------|-----------|----------|--------------|---------------------------------|----------|-----------|----------|--------------|
|                           | <b>Ca</b>             | <b>K</b> | <b>Nb</b> | <b>O</b> | <b>Total</b> | <b>Ca</b>                       | <b>K</b> | <b>Nb</b> | <b>O</b> | <b>Total</b> |
| <b>1</b>                  | 14.07                 | 1.57     | 46.93     | 25.82    | 88.39        | 13.99                           | 1.60     | 20.12     | 64.29    | 100          |
| <b>2</b>                  | 13.94                 | 1.14     | 47.04     | 25.82    | 87.93        | 13.93                           | 1.17     | 20.28     | 64.63    | 100          |
| <b>3</b>                  | 13.37                 | 1.58     | 47.15     | 25.64    | 87.74        | 13.43                           | 1.63     | 20.43     | 64.51    | 100          |
| <b>4</b>                  | 13.38                 | 1.28     | 45.56     | 24.96    | 85.17        | 13.81                           | 1.35     | 20.29     | 64.54    | 100          |
| <b>5</b>                  | 12.98                 | 1.40     | 44.94     | 24.53    | 83.85        | 13.62                           | 1.51     | 20.36     | 64.51    | 100          |
| <b>Average</b>            |                       |          |           |          |              | 13.75                           | 1.45     | 20.30     | 64.50    |              |
| <b>Atomic Composition</b> |                       |          |           |          |              | 1.97                            | 0.21     | 2.90      | 9.21     |              |

\*Carbon and hydrogen cannot be accurately quantified due to analytical limitations

## 2. Calculation of surface charge density from estimated surface potential

### Physical Constants

|                                                                                                                                            |          |                                     |
|--------------------------------------------------------------------------------------------------------------------------------------------|----------|-------------------------------------|
| $N_A$ (Avogadro number)                                                                                                                    | 6.02E+23 | mol <sup>-1</sup>                   |
| R (Ideal Gas constant)                                                                                                                     | 8.314    | J K <sup>-1</sup> mol <sup>-1</sup> |
| F (Faraday constant)                                                                                                                       | 96485    | sA mol <sup>-1</sup>                |
| T (absolute Temperature)                                                                                                                   | 298      | K                                   |
| z (Charge)                                                                                                                                 | 1        |                                     |
| $\epsilon_0$ (Permittivity)                                                                                                                | 8.85E-12 | F m <sup>-1</sup>                   |
| $\epsilon$ (relative Permittivity)                                                                                                         | 30       |                                     |
| Geometrical footprint of<br>LiCa <sub>2</sub> Nb <sub>3</sub> O <sub>10</sub> formula unit<br>on nanosheet (one side,<br>see figure below) | 0.149    | nm <sup>2</sup>                     |
| (both sides)                                                                                                                               | 0.298    | nm <sup>2</sup>                     |

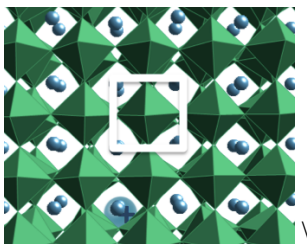

LiCa<sub>2</sub>Nb<sub>3</sub>O<sub>10</sub> footprint calculated from structural data from Dion et al. <sup>1</sup>

**Grahame Equation** from reference <sup>2</sup>

$$\sigma = \sqrt{8RT\epsilon\epsilon_0 c^0} \sinh\left(\frac{zF\phi_0}{2RT}\right)$$

$\sigma$ : surface charge density (C m<sup>-2</sup>),  $\phi_0$ : surface potential (V),  $c_0$ : counterion concentration

(mol L<sup>-1</sup>); for other constants see table above

Importantly, the unknown Cl<sup>-</sup> counterion concentration  $c^0$  in the nanosheet films is estimated as only 10% of the solution value (0.1 M) because the large (C<sub>2</sub>H<sub>5</sub>)<sub>4</sub>N<sup>+</sup> ion has limited ability to penetrate the film. Using the solution concentration value of 0.1 M produces surface potentials of ~ 10 mV, a factor of 10 below the experimental values.

| PDI induced surface potential / V | Nanosheet film electrolyte conc / mol m <sup>-3</sup> | Nanosheet film charge density / C m <sup>-2</sup> | Elemental charge per nm <sup>2</sup> of nanosheet | Elemental charge per nanosheet formula unit | PDI's per formula unit from microprobe analysis |
|-----------------------------------|-------------------------------------------------------|---------------------------------------------------|---------------------------------------------------|---------------------------------------------|-------------------------------------------------|
| <b>0.04</b>                       | <b>1.00E+01</b>                                       | <b>6.24E-03</b>                                   | <b>3.89E-02</b>                                   | <b>1.31E-01</b>                             | <b>K+: 0.21 (=0.21 +)</b>                       |
| <b>0.12</b>                       | <b>1.00E+01</b>                                       | <b>3.72E-02</b>                                   | <b>2.32E-01</b>                                   | <b>7.79E-01</b>                             | <b>Sr<sup>2+</sup>: 0.11 (=0.22 +)</b>          |
|                                   |                                                       |                                                   |                                                   |                                             |                                                 |
|                                   |                                                       |                                                   |                                                   |                                             |                                                 |

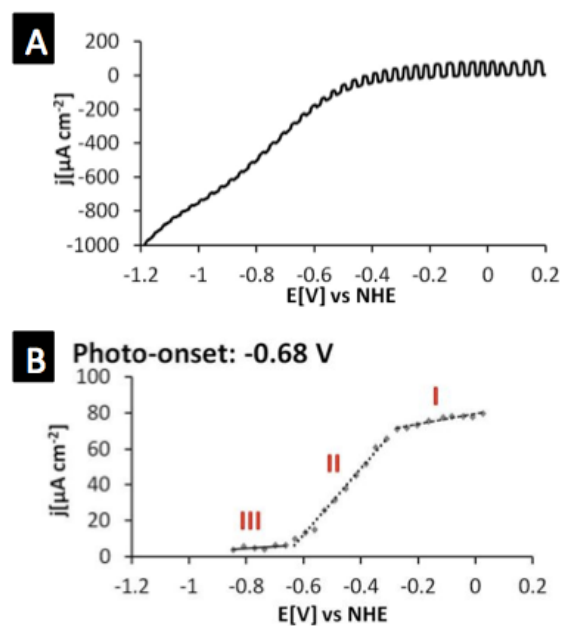

**Figure S1.** A) Photocurrent scan for pH 3-modified nanosheet film on FTO. Irradiated using chopped light from 300 W Xe arc lamp in 0.1 M TEACl in methanol. B) Absolute photocurrent density versus voltage curve for same photocurrent scan.

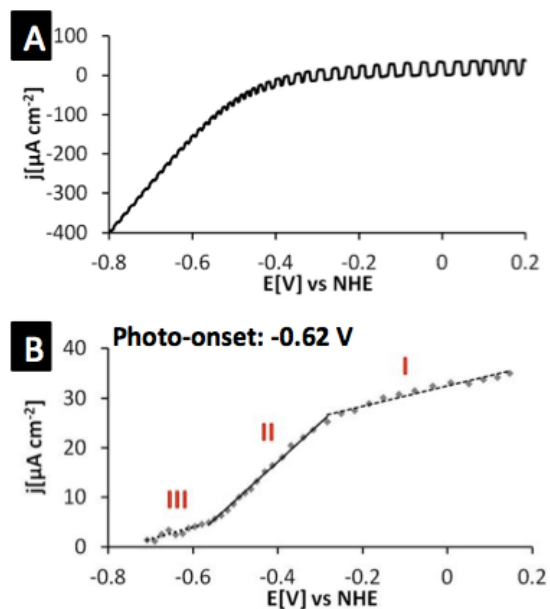

**Figure S2.** A) Photocurrent scan for pH 1-modified nanosheet film on FTO. Irradiated using chopped light from 300 W Xe arc lamp in 0.1 M TEACl in methanol. B) Absolute photocurrent density versus voltage curve for same photocurrent scan

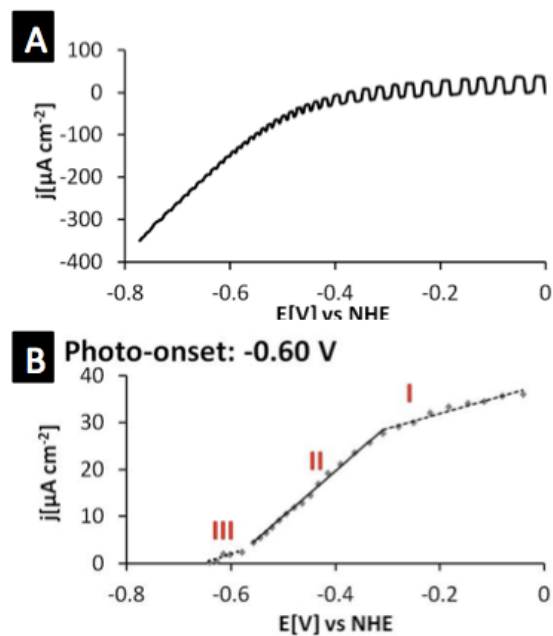

**Figure S3.** A) Photocurrent scan for  $\text{Sr}^{2+}$ -modified nanosheet film on FTO. Irradiated using chopped light from 300 W Xe arc lamp in 0.1 M TEACl in methanol. B) Absolute photocurrent density versus voltage curve for same photocurrent scan

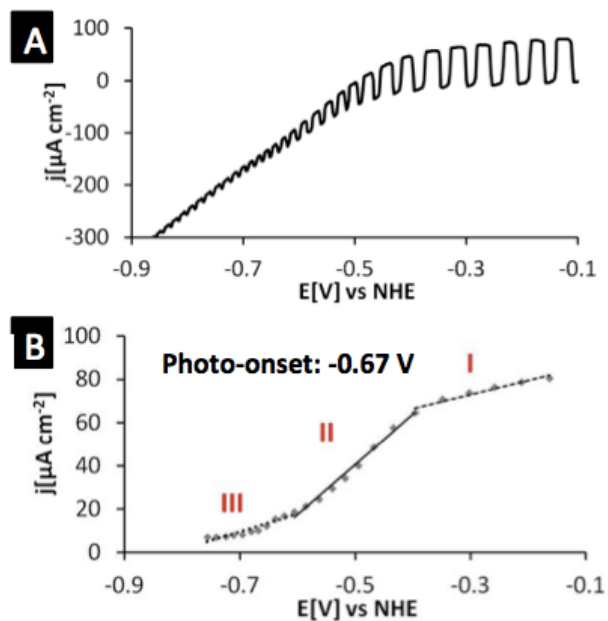

**Figure S4.** A) Photocurrent scan for  $\text{K}^{+}$ -modified nanosheet film on FTO. Irradiated using chopped light from 300 W Xe arc lamp in 0.1 M TEACl in methanol. B) Absolute photocurrent density versus voltage curve for same photocurrent scan

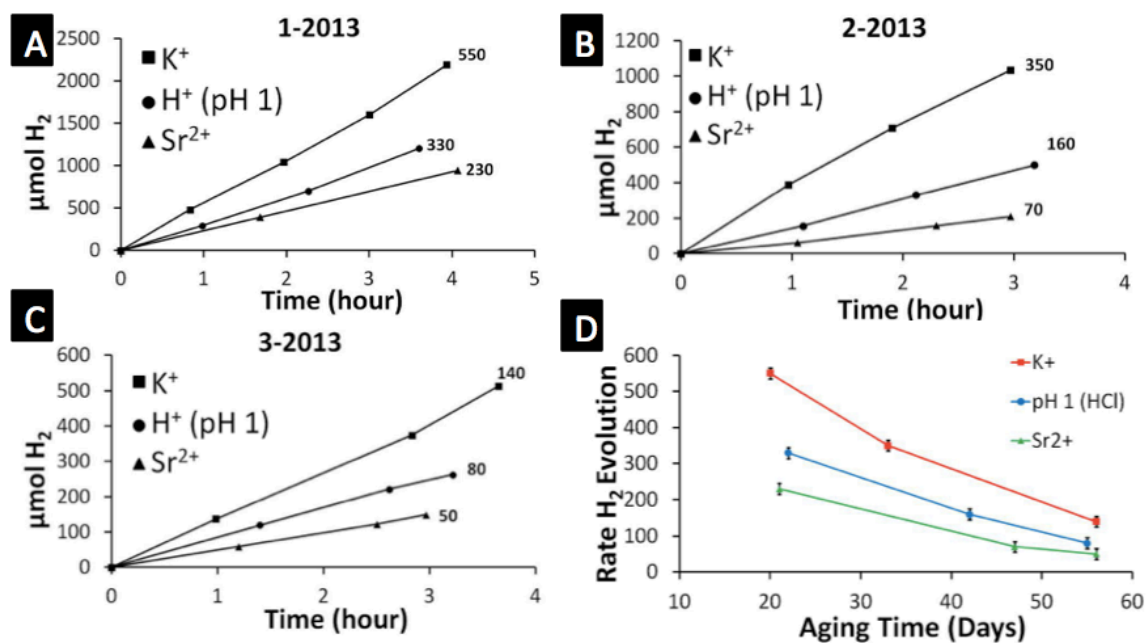

**Figure S5.** Time-dependent hydrogen evolution of cation-modified  $M_xH_{1-x}[Ca_2Nb_3O_{10}]$ . Results are for 25 mg of catalyst dispersed in 50 mL 20% aqueous methanol at pH 1 in a 100 mL quartz flask under irradiation with a 300 W Xe arc lamp. Age of stock  $TBA_xH_{1-x}[Ca_2Nb_3O_{10}]$  increases from A) to C). D) Dependence of rate of  $H_2$  evolution on aging time of stock  $TBA_xH_{1-x}[Ca_2Nb_3O_{10}]$

## References

1. M. Dion, M. Ganne and M. Tournoux, *Materials Research Bulletin*, 1981, **16**, 1429-1435.
2. A. J. Bard and L. R. Faulkner, *Electrochemical methods : fundamentals and applications*, John Wiley, New York, 2001.
